# Supplementary material
Source: publisher figshare collection journal article supplement (https://karger.figshare.com/ndownloader/files/14859974)
Supplement: Supplementary file 1 [file 14859974]

**Fig. S5.** Negative pollen controls with *Chenopodium album* using mAbs specific to mugwort Art v 1 and Art v 3. No positive red signals present.
